# Supplementary material
Source: PubMed Central journal article supplement (PMC7700771)
Supplement: NIHMS1640923-supplement-SI_text.pdf [file NIHMS1640923-supplement-SI_text.pdf]

17 This document contains 43 pages and 10 figures. 23 tables are contained in an Excel  
18 workbook titled “PFAS in Seabird Liver\_SuppTables\_Revised\_Final.xlsx”  
19

20 *Table of Contents*  
21

|    |                                                                                                                      |           |
|----|----------------------------------------------------------------------------------------------------------------------|-----------|
| 22 | <b>Chemicals, reagents, and materials</b> .....                                                                      | <b>4</b>  |
| 23 | <b>Sample collection details</b> .....                                                                               | <b>4</b>  |
| 24 | <b>Support for a multi-species, variable age comparison</b> .....                                                    | <b>5</b>  |
| 25 | <i>Figure S1. Map of the US Atlantic East Coast</i> .....                                                            | 13        |
| 26 | <b>Sample condition and necropsy</b> .....                                                                           | <b>14</b> |
| 27 | <b>Sample preparation for UPLC-MS/MS</b> .....                                                                       | <b>16</b> |
| 28 | <b>UPLC-MS/MS analysis</b> .....                                                                                     | <b>17</b> |
| 29 | <b>Sample preparation for HRMS</b> .....                                                                             | <b>18</b> |
| 30 | <b>HRMS analysis</b> .....                                                                                           | <b>18</b> |
| 31 | <b>Quality Assurance and Quality Control</b> .....                                                                   | <b>19</b> |
| 32 | <b>Stable Isotope Analysis Sample Preparation and Analysis</b> .....                                                 | <b>23</b> |
| 33 | <b>Phospholipid analysis</b> .....                                                                                   | <b>24</b> |
| 34 | <b>More detail about stable isotope values and relationships</b> .....                                               | <b>24</b> |
| 35 | <b>Bioaccumulation factors</b> .....                                                                                 | <b>27</b> |
| 36 | <b>Miscellaneous Supporting Figures</b> .....                                                                        | <b>28</b> |
| 37 | <i>Figure S2. Concentrations of PFUdA by habitat</i> .....                                                           | 28        |
| 38 | <i>Figure. S3. Observed concentrations of PFOS versus concentrations of PFNA, PFDA,</i><br>39 <i>and PFUdA</i> ..... | 29        |
| 40 | <i>Figure S4. Concentrations of C8 – C14 PFCAs as a function of PFDA</i> .....                                       | 30        |
| 41 | <i>Figure. S5. Observed concentrations of emerging PFEAs versus legacy PFAS in</i><br>42 <i>CFRE chicks</i> .....    | 31        |
| 43 | <i>Figure S6. <math>\delta^{15}N</math> vs concentrations of PFAS</i> .....                                          | 32        |
| 44 | <i>Figure S7. <math>\delta^{13}C</math> vs concentrations of PFAS</i> .....                                          | 33        |
| 45 | <i>Figure S8. <math>\delta^{13}C</math> in key organic and inorganic matrices</i> .....                              | 34        |
| 46 | <i>Figure S9. Log BAFs for 10 compounds across three habitats.</i> .....                                             | 35        |

|    |                                                                                        |           |
|----|----------------------------------------------------------------------------------------|-----------|
| 47 | <i>Figure S10. Chromatograms of Nafion BP2 in native standard and Great Shearwater</i> |           |
| 48 | <i>liver</i> .....                                                                     | 36        |
| 49 | <b>Tables</b> .....                                                                    | <b>37</b> |
| 50 | <b>References</b> .....                                                                | <b>37</b> |
| 51 |                                                                                        |           |

52 **Chemicals, reagents, and materials**

53  
54 Analytical standards of greater than 99.9% purity, including mass-labeled surrogates,  
55 were purchased from Wellington Laboratories (Guelph, ON, Canada). Native Nafion  
56 BP2 and PFO5DoDA were provided by Chemours (Fayetteville, NC) in lieu of a  
57 commercial source. HPLC grade methanol was purchased from Fisher Scientific  
58 (Waltham, MA, USA). Ultrapure water for equipment cleaning was obtained from a Milli-  
59 Q system fit with an HPLC water polisher or via HPLC grade water purchased from  
60 Fisher Scientific (Waltham, MA, USA). ENVI Carb 2g cartridges were purchased from  
61 Sigma-Aldrich (St. Louis, MO, USA). Ammonium acetate was purchased from Fisher  
62 Scientific (Waltham, MA, USA)

63

64 **Sample collection details**

65  
66 All birds were obtained opportunistically for use in this study, and no birds were killed for  
67 the purposes of this study. Birds were collected and stored in accordance with URI  
68 Biosafety standards and the Migratory Bird Treaty Act.

69

70 Dead Great Shearwater juveniles (*Ardenna gravis*) were obtained as bycatch from the  
71 National Oceanic and Atmospheric Administration (NOAA) Northeast Fisheries  
72 Observer Program (Falmouth, MA). Dead Herring Gull (*Larus argentatus*  
73 *smithsonianus*) chicks were obtained from the Wildlife Clinic of Rhode Island  
74 (Narragansett, RI). Dead Royal Tern (*Thalasseus maximus*), Sandwich Tern  
75 (*Thalasseus sandvicensis*), Laughing Gull (*Leucophaeus atricilla*), and Brown Pelican

76 (*Pelecanus occidentalis*) chicks were obtained as part of routine field and nest surveys  
77 conducted by North Carolina Audubon (Wilmington, NC).

78

79 Great Shearwaters in this study were self-feeding and had completed their first  
80 migration from their remote breeding site in the South Atlantic at approximately 5-6  
81 months old, and are therefore considered juveniles. Great Shearwaters were confirmed  
82 to be juveniles based on molt status, presence of the bursa of Fabricius, and stage of  
83 gonad development. All birds from Rhode Island and North Carolina were pre-fledging  
84 birds under 8 weeks of age, still under parental care at time of death. All individuals  
85 were hatch-year juveniles, under approximately six months of age. Great Shearwaters  
86 were 5-6 years away from reproductive maturity, while gulls, terns, and pelicans, who  
87 mature more rapidly, were at least a year away from reproductive maturity (Tables S3-  
88 S4).

89

## 90 **Support for a multi-species, variable age comparison**

91

### 92 Species

93 The literature does not currently support the hypothesis of significantly different uptake,  
94 metabolism, or elimination rates between similar seabird species. The species included  
95 in this study are similar in trophic strategy and preferred prey items, facilitating an  
96 acceptable comparison.

#### 97 *a) Species-based differences in bioaccumulation capacity*

98 We point to multiple studies across the literature that suggest foraging preferences,  
99 migratory strategies, and other life history details that determine exposure potential

100 drive PFAS concentrations rather than innate differences in bioaccumulation capacity  
101 between seabird species<sup>1,2,11,3-10</sup>.

102

103 The most valuable support of our sample design comes from studies investigating  
104 concentration trends in multiple species surrounding concerted PFAS sources. Lopez-  
105 Antia et al. (2017) examined PFOS levels in eggs from three species of bird surrounding  
106 a fluoropolymer production site in the Netherlands. The study focused on species that  
107 were unambiguously different from one another in terms of size and diet, unlike the  
108 similar seabirds included in our study. Great tits are a small passerine (songbird)  
109 species that primarily feeds on insects; northern lapwings are small-medium marsh  
110 wading birds that feed on small aquatic invertebrates or insects. Mediterranean gulls are  
111 opportunist seabirds that feed on fish, bivalves, or crustaceans. The study found no  
112 statistically significant differences in egg PFOS levels among the three species,  
113 suggesting the common exposure source drove PFOS levels in all birds without clear  
114 species-level differences in adult uptake, metabolism, or elimination via maternal  
115 offloading. Similarly, Yoo et al. (2008) examined PFAS in eggs from three bird species  
116 nesting on Lake Shiwa in Korea, a large, industrially-influenced artificial seawater lake.  
117 The study found no significant differences in PFOS and  $\sum_5$ PFCA between little egret (a  
118 large wading bird), little ringed plover (a small shorebird), and parrot bill (a small  
119 songbird-like bird) eggs.

120

121 Data from controlled studies indicate approximately equivalent accumulation efficiency  
122 in adult quails (a game bird) and mallards (a duck)<sup>9</sup>. Domestically reared adult birds

123 from both species and sexes were exposed to the same PFOS levels via diet. Adult  
124 livers and serum were found to contain similar PFOS levels at the completion of  
125 exposure; larger differences were apparent between sexes of the same species than  
126 between different species. Egg yolk and 14-day old juvenile liver and serum also  
127 displayed comparable PFOS levels between both species, without the stark differences  
128 between sexes.

129

130 Roscales et al. 2019 compared PFAS levels in seabird serum from multiple habitats in  
131 or adjacent to the Southern Ocean<sup>11</sup>. Two species were sampled within three colonies  
132 across different latitudes and ocean basins. Measurements show larger differences  
133 between the same species at different locations, compared to observed differences  
134 between different species at the same colony (Roscales et al. 2019, Table 1). This  
135 suggests location-based exposure factors, like proximity to PFAS sources or prey PFAS  
136 levels, are the primary determinant of PFAS in similar seabird species.

137

138 Beyond avifauna, we note that data from marine mammals suggests taxa with a shared  
139 phylogeny conserve cellular and tissue machinery driving internal kinetics of PFAS. For  
140 example, evidence in marine mammals demonstrates conservation of metabolic  
141 pathways at the family level rather than the species level; data to date suggests all  
142 odontocete cetaceans are unable to efficiently metabolize FOSA<sup>12-16</sup>.

143

144 Species-specific toxicokinetic processes and rates are certainly possible and have been  
145 demonstrated across contrasting mammal species like rats and humans<sup>17</sup>. However,

146 based on the available data showing similar tissue residues in seabirds and other types  
147 of birds subject to similar PFAS exposures, we suggest further data is required to  
148 rigorously support the claim of significantly different accumulation, metabolism, or  
149 elimination pathways or rates at a species level in similar birds. The data we have on  
150 hand suggests comparisons across multiple species are acceptable, and any major  
151 differences in PFAS levels are due to dietary and habitat factors. We highlight this as an  
152 important research gap considering the utility of birds as ecosystem sentinels.

153

154 *b) Ontogenetic and diet differences that confound comparison between species*

155 As the above evidence suggests, habitat-related exposure and dietary choices likely  
156 drive PFAS levels more than major innate differences in toxicokinetics between seabird  
157 species. We assert that the birds included in our study are roughly comparable in diet,  
158 all feeding primarily on forage fish and invertebrates (Table S2). All species  
159 demonstrate some reliance on Atlantic menhaden *Brevoortia tyrannus*, a key forage fish  
160 found along the US Atlantic seaboard from Florida to Nova Scotia. All species are  
161 plungers and opportunists rather than pursuit divers. This broad similarity in trophic  
162 strategy and position allows our study to highlight and compare differences in PFAS  
163 levels due to habitat-driven factors like human inputs and proximity to production  
164 sources.

165

166 Age

167 Our study focused on how each habitat/lifestyle contributes PFAS to an associated  
168 sentinel predator, and by sampling juveniles and chicks we avoid life history



169 complications associated with older birds to focus on this question. While chick and  
170 juvenile stages are distinct in many ways, we do not believe the differences in these life  
171 stages significantly compromise PFAS measurements in our study due to the influence  
172 of maternal offloading, and the long half-life of PFAS.

173 *a) Both chick and juvenile birds primarily reflect maternal offloading*

174 PFAS are very persistent in the environment and in biota. PFAS transferred from  
175 mother to offspring do not readily dissipate over the first few months of development.  
176 The lengthy plasma half-life of PFOS in birds (231 days) means that both chicks (~14 –  
177 56 days old) and juveniles (~140 – 170 days old) within this study retain and reflect the  
178 influence of maternal offloading in liver measurements<sup>18</sup>. Short-term exposure trials in  
179 juvenile quail and mallard suggest the liver half-life of PFOS is roughly 2.5 times that of  
180 the serum half-life. Using the plasma half-life derived in Tarazona et al. 2015, this  
181 equates to an estimated liver half-life for PFOS of 578 days in birds, or 1.6 years. Liver  
182 elimination of PFAS via biliary excretion has been demonstrated to be very slow (~1%  
183 of supplied dose)<sup>19</sup>, and liver metabolism of most PFAAs is thought to negligible.  
184 Therefore we reiterate that all individuals of all ages used in this study primarily reflect  
185 the influence of maternal offloading. A longer duration of self-feeding by Great  
186 shearwaters is unlikely to offset or surpass the PFAS burden received *in ovo*; a study  
187 examining prey fish concentrations compared to egg and juvenile liver concentrations in  
188 guillemots suggested maternal offloading exposure drastically exceeded dietary  
189 inputs<sup>20</sup>. Measurement of shearwater prey (sand lance) from Massachusetts Bay points  
190 to similar, low levels of PFAS exposure from offshore prey ( $\sum_{12}$ PFAAs: ~1 – 8 ng/g  
191 whole body, wet weight) (Robuck, unpublished data). We also point to seabird literature

192 that suggests adults of these species provision their young with the same or similar  
193 species that they themselves consume, meaning the dietary additions provided to  
194 chicks were similar or identical to those prey items that contributed to PFAS burdens in  
195 mothers prior to maternal offloading (Table S2).

196

197 The duration of dietary exposure was longer for the older juveniles, who had been self-  
198 feeding for several months. More importantly, these birds also had a longer growth  
199 period, causing growth dilution of maternally offloaded PFAS in liver.

200

201 *b) There is no evidence that specific cellular and tissue machinery known to drive PFAS*  
202 *accumulation differ with age.*

203 PFAS accumulation is driven by associations with specific proteins in liver and blood, in  
204 tandem nonspecific associations with amphiphilic structural lipids<sup>21–23</sup>. We are not aware  
205 of any data demonstrating age-based differences in the protein structures or binding  
206 efficiency of liver fatty acid binding protein and albumin, the two primary proteins  
207 identified to drive PFAS accumulation in liver and blood. Rather, data from *in ovo*  
208 studies demonstrates the ability of developing embryos to readily accumulate PFAS in  
209 liver, at levels on par with or exceeding maternal liver concentrations<sup>9</sup>. Data from *in*  
210 *utero* exposure studies in mice reiterate the same<sup>24</sup>. Current, albeit limited, data suggest  
211 no appreciable changes in bulk liver phospholipid levels over chick development<sup>25</sup>,  
212 though rapid changes in storage lipid content occur across all tissues during chick  
213 development<sup>26</sup>. Our data in Figure 4 reiterates this – chicks from Narragansett Bay had  
214 phospholipid levels similar to older Great Shearwater juveniles (possibly due to similar

215 PFOS levels) compared to chicks from the CFRE of the same age and from the same  
216 family. Elimination rates have been shown to be sex-dependent, but no data exist  
217 describing age-specific elimination differences in birds<sup>9,18,27</sup>. Specific mechanisms of  
218 PFAS uptake may change on a bulk level with tissue growth as more tissue is available  
219 to interact with PFAS, but we believe this would not be apparent in our measurements  
220 normalized to ng PFAS/g tissue basis. More importantly, the maternally offloaded  
221 burden of PFAS would be diluted with tissue growth. Overall, more research is needed  
222 to explore changes in PFAS uptake with age, but data to date do not indicate  
223 substantial changes in tissue components driving bioaccumulation of PFAS.

224

225 *c) PFAS are not stored in fat*

226 PFAS are not stored in fat akin to legacy persistent organic pollutants like  
227 polychlorinated biphenyls or DDT<sup>28-31</sup>, meaning the rapid development of adipose fat  
228 stores in juveniles that may impact hydrophobic pollutant levels is not likely to impact  
229 organ levels of PFAS in chicks or juveniles.

230

231 *d) PFAS demonstrate an inverse relationship with age*

232 Current literature suggests PFAS do not display the same positive relationships  
233 between age like some legacy POPs<sup>32</sup>. Data from several taxa indicate PFAS are  
234 significantly higher in juveniles compared to adults<sup>33-37</sup>. Possible explanatory  
235 mechanisms for this negative relationship include the influence of maternal offloading  
236 combined with the long tissue half-lives of many PFAS, or growth-mediated biodilution.  
237 Research examining PFAS in maternal liver, egg, and chick liver have found the highest

238 PFAS levels in egg, with subsequent chick liver containing PFOS on par with or higher  
239 than the mother's liver<sup>9,20</sup>. This suggests that like other wildlife taxa, seabirds also  
240 display a negative relationship between PFAS and age. By measuring young birds, we  
241 are likely measuring the highest concentrations experienced by these individuals  
242 throughout their lifetimes, during a critical development window.

243

244 *e) Juveniles are not impacted by reproductive cycles which confound measurements in*  
245 *adults.* Seabirds have been shown to offload significant concentrations of PFAS in  
246 eggs<sup>28,29,38</sup>.

247

248 *f) Using juvenile or immature dead seabirds allows measurement of individuals of a*  
249 *known age and sex.* Most adult seabirds (including all species included in this study)  
250 can't be aged or sexed by plumage or morphometric characteristics after their first year  
251 of age.

252 *g) Juveniles demonstrate some of the most predictable ties to a given foraging habitat,*  
253 *helping to constrain dietary and habitat influences on PFAS levels.* For chicks, this is  
254 caused by parents engaging in central-place foraging, meaning the adults find food for  
255 their chicks within a region adjacent to the nesting colony to facilitate continuous  
256 provisioning of chicks. For the Great Shearwater juveniles which were self-feeding,  
257 multiple years of tracking data suggest hatch year birds forage in a predictable home  
258 range across Massachusetts Bay, the Great South Channel off Cape Cod, and Georges  
259 Bank while adults may forage more widely across a larger pelagic region<sup>39,40</sup>.

260

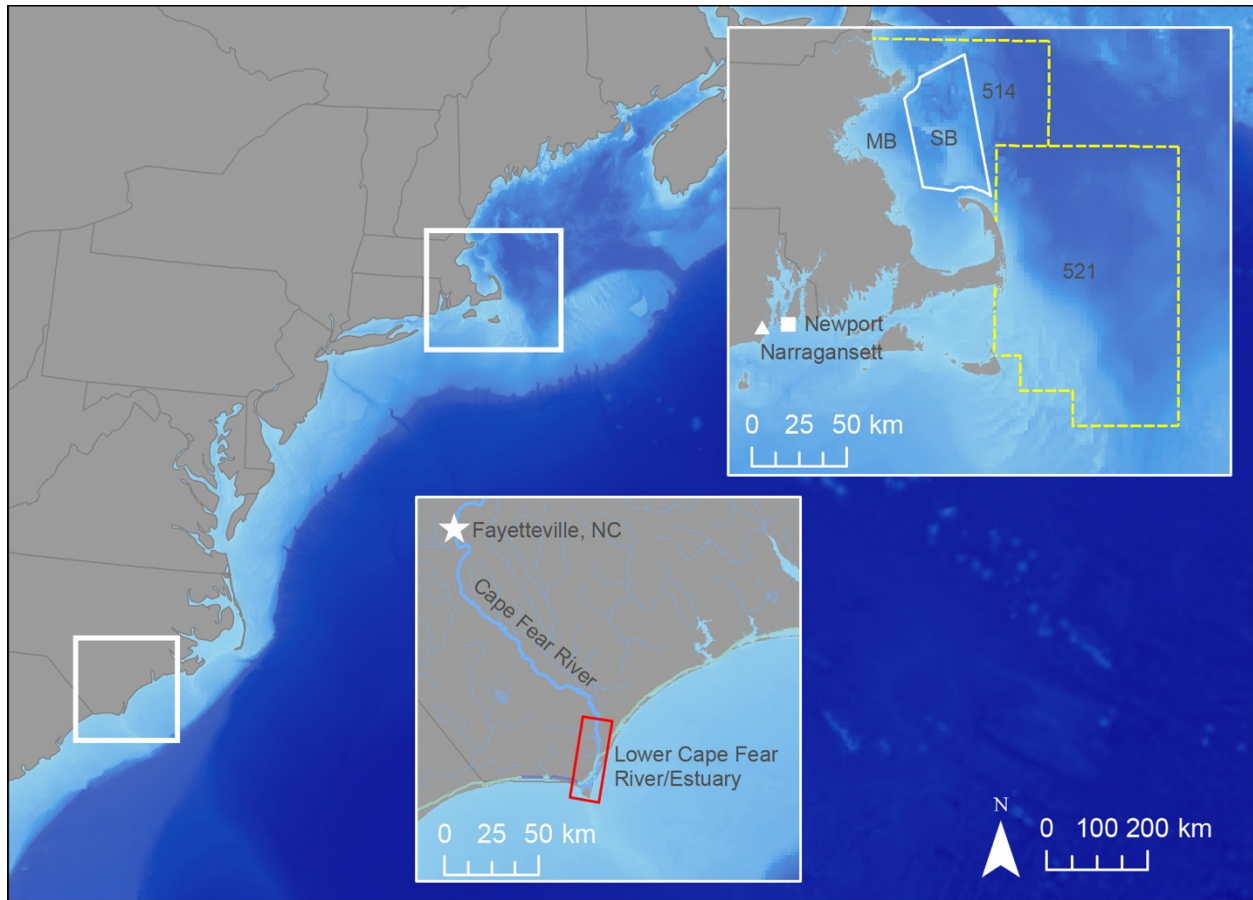

261

262 *Figure S1. Map of the US Atlantic East Coast.* Insets provide further detail about

263 collection locations of from each habitat. Great shearwaters were collected as bycatch

264 in Massachusetts Bay and off Cape Cod, designated as NOAA Fisheries Stat Areas 514

265 and 521. Stellwagen Bank National Marine Sanctuary, a key foraging area for Great

266 Shearwaters, is outlined in white and indicated as “SB” in the top right inset. Herring

267 Gull chicks came from nests located in Narragansett, RI and Newport, RI. The bottom

268 inset shows the Cape Fear River and Estuary system, located in southeastern NC. A

269 Chemours facility is located near Fayetteville, NC, designated on the map as a white

270 star. The red box indicates the lower river and estuary portion of the system; CFRE

271 chicks were hatched on dredge islands near the mouth of the estuary.

272 **Sample condition, cause of death, and necropsy**

273  
274 Great Shearwaters and Herring Gulls were freshly or very recently dead, and frozen  
275 immediately with no decomposition apparent.

276  
277 The procurement of tissues from juvenile Great Shearwaters caught via fishing bycatch  
278 is extremely unlikely to impact liver integrity. Juvenile Great Shearwaters were bycaught  
279 via gillnet. Lung hemorrhaging and edema was apparent in some bycatch seabirds  
280 (indicative of drowning), but there was no evidence of seawater intrusion into the  
281 coelomic cavity housing the liver, and no perforations or damage to any other internal  
282 organs beyond lung hemorrhaging. As such we consider bycatch birds as excellent  
283 sample specimens, in good condition with no apparent liver degradation or trauma.

284  
285 Tern, Laughing Gull, and Brown Pelican chicks were recently deceased; chicks spent a  
286 maximum of 24-48 hours exposed to the elements prior to collection due to the colony  
287 monitoring schedule. Some decomposition was apparent externally on a few individuals.  
288 This decomposition was entirely external, apparent via reduced eye integrity, mouth  
289 mucus membrane color, and skin pallor. No CFRE individuals displayed evidence of  
290 scavenging or substantial autolysis internally.

291  
292 Phosphatidylcholines, the primary type of phospholipid measured with our bulk assay,  
293 have demonstrated stability up to 48 hours after death at 24.1 C, 50% humidity, and  
294 atmospheric pressure, suggesting the lipid measurements from CFRE chicks produced

295 within our study are likely free from majorly compromising impacts related to post-death  
296 putrefaction, autolysis, or pH diminution<sup>41,42</sup>.

297

298 Massachusetts and Narragansett Bay birds were otherwise healthy birds that met  
299 unfortunate ends. Narragansett Bay birds fell from their nests and broke one or more  
300 limbs, while Massachusetts Bay birds drowned or were strangled in fishing nets. There  
301 was no indication of other health problems impacting these individuals that could  
302 influence contaminant distributions observed.

303

304 Cape Fear birds died due to mostly uncertain causes – predation was not the cause of  
305 death because all deceased individuals were collected intact. Colony monitoring data  
306 from multiple locations suggests nest abandonment as the most common cause of chick  
307 death. Seabirds such as terns and pelicans are very sensitive to disturbance. They will  
308 readily abandon a nest due to human, predator, or insect disturbance<sup>43–46</sup>– the chick  
309 would then die of dehydration or cold stress. Chicks may also die from tidal flooding or  
310 starvation. Chilling, dehydration, and tidal flooding are unlikely to impact contaminant  
311 levels in chick livers. PFAS are minimally stored in fat, therefore any starvation-induced  
312 use of fat stores is unlikely to release PFAS to liver and overall circulation, should  
313 starvation have been the cause of death for any of these birds. No widespread  
314 starvation event was apparent in the CFRE region in 2017, making this final potential  
315 cause of death somewhat unlikely.

316

317 All birds were frozen following collection and tissues sampled within two months.  
318 Species identification was corroborated by both specimen collector and necropsy  
319 prosector. Each seabird individual was partially thawed and necropsied according to  
320 standard protocol, documenting morphometric features, organ weights, overall body  
321 condition, sex, and stomach contents after van Franeker 2004<sup>47</sup>. Birds were sexed if  
322 gonads were visually identifiable, and aged using morphometric, gonad, and bursa  
323 characteristics along with nest observations. Multiple tissues including liver were  
324 collected from each bird, and all tissue samples were wrapped in solvent-cleaned  
325 aluminum foil, stored in polyethylene baggies, and frozen until analysis at -15C. More  
326 details about sample collection locations, bird morphometric data, age, sex, and sample  
327 condition can be found in Table S3.

## 328 **Sample preparation for UPLC-MS/MS**

329

330 A modified extraction procedure was developed to maximize sample throughput while  
331 minimizing matrix effects and extraction losses, incorporating steps employed in several  
332 previously published extraction protocols<sup>28,48–50</sup>. A tissue aliquot was weighed into a  
333 polypropylene tube and 4ml of methanol added, followed by 10 ng of isotopically labeled  
334 PFAS surrogate mix (1ng/ $\mu$ L). Samples were vortexed for 30 seconds, and allowed to  
335 equilibrate for 30 minutes. Samples were again vortexed for 30 seconds, sonicated for  
336 20 minutes, and centrifuged at 4,000 rpm for ten minutes. The resulting supernatant  
337 was decanted into a fresh polypropylene tube, and the extraction procedure repeated  
338 with 4 mL of 2 mM ammonium acetate in methanol. The extract was frozen at -15C for  
339 at least four hours to encourage precipitation of additional biological material and then



340 centrifuged for three minutes under refrigeration, directly followed by decanting the  
341 supernatant for clean-up.

342

343 The combined extract was cleaned up using Supelclean ENVI-Carb cartridges (2g, 12  
344 mL, 100–400 mesh, Supelco, U.S.A.). The cartridges were cleaned with 8 mL methanol  
345 prior to sample introduction. After sample clean-up, each cartridge was rinsed with 2 mL  
346 of methanol. Clean-up was repeated if the final extract contained any hint of color. The  
347 extracts were dried to 250  $\mu$ L at 32°C under 5–7 psi N<sub>2</sub>, and reconstituted to 1 mL using  
348 2mM ammonium acetate in water for a final sample makeup ratio of 3 parts aqueous: 1  
349 part organic extract. The 1 mL extracts were centrifuged at 10,000 rpm for fifteen  
350 minutes at 5°C to remove any remaining tissue residues; the final extract minus any  
351 pellet solids was transferred to an autosampler vial in preparation for instrumental  
352 analysis.

### 353 **UPLC-MS/MS analysis**

354

355 40  $\mu$ L of sample extract was injected, and chromatographic separation achieved using a  
356 50 mm BEH C-18 column interfaced to a Waters Acquity UPLC. The mobile phase was  
357 made up of methanol and HPLC-grade water modified with 2mM ammonium acetate,  
358 made fresh before each run. The applied gradient is detailed in Table S10, the flow rate  
359 was set at 0.4mL/min, and column temperature set at 45°C.

360

361 Detection of PFAS was carried out using UPLC-MS/MS in negative electrospray  
362 ionization mode. Multiple reaction monitoring (MRM) was employed, monitoring two  
363 transitions for each compound as available, detailed in Table S7 and S9. Desolvation

364 temperature was set at 400°C, desolvation gas flow at 600 L/hr, source temperature  
365 was set at 150°C, and cone gas flow set at 30°C. Optimal transitions and analyte-  
366 specific energies were generated using Intellistart software in combination with  
367 manually performed direct infusion experiments.

368  
369 Quantitation was carried out using an isotope-dilution approach; those analytes lacking  
370 a matched mass-labelled standard were quantified using a mass-labelled surrogate of  
371 similar molecular weight and retention time (Table S7).

### 372 **Sample preparation for HRMS**

373  
374 A tissue aliquot was diluted with three parts water and homogenized to a uniform slurry.  
375 An aliquot of homogenate was diluted 4:1 with 0.1M formic acid and vortexed for 30  
376 seconds. The denatured extract was further diluted 5:1 with cold acetonitrile and  
377 centrifuged for 5 min at 10000 rpm. An aliquot of the supernatant was removed and  
378 combined with dilute ammonium formate buffer (2.5mM) to obtain a final sample extract  
379 ratio of 3 parts aqueous: 1 part organic extract.

### 380 **HRMS analysis**

381  
382 100 ul of sample was injected, and chromatographic separation achieved using a  
383 Vanquish UPLC system equipped with an Accucore 100 mm reverse-phase C18 column,  
384 at a flow rate of 300 ul/min. Mobile phase constituents included Solvent A (95:5 water:  
385 acetonitrile) and Solvent B (95:5 acetonitrile:water). Mobile phase gradient is detailed in  
386 Table S11. Nafion byproduct 2 (Nafion BP2, or 2-[1-[difluoro(1,2,2,2-  
387 tetrafluoroethoxy)methyl]-1,2,2,2-tetrafluoroethoxy]-1,1,2,2-tetrafluoro-ethanesulfonic

388 acid) and PFO<sub>5</sub>DoDA (2,2,4,4,6,6,8,8,10,10,12,12-Tridecafluoro-3,5,7,9,11-  
389 pentaoxadodecanoic acid) were identified with authentic native standards, while PFO<sub>4</sub>DA  
390 (perfluoro-3,5,7,9-tetraoxadecanoic acid), PFMA (2,3,3,3-tetrafluoro-2-  
391 (trifluoromethoxy)-propanoic acid), PFO<sub>2</sub>HxA (perfluoro-3,5-dioxahexanoic acid), PEPA  
392 (Perfluoro-2-ethoxypropanoic acid), PFO<sub>3</sub>OA (Perfluoro(3,5,7-trioxaoctanoic) acid),  
393 NVHOS (1,1,2,2-tetrafluoro-2-(1,2,2,2-tetrafluoro-ethoxy)ethane sulfonic acid), Nafion  
394 byproduct 4 (2,2,3,3,4,5,5,5-4-(1,1,2,2-tetrafluoro-2-sulfoethoxy) pentanoic acid), Nafion  
395 byproduct 1 (2-[1-[difluoro[(1,2,2-trifluoroethenyl)oxy]methyl]-1,2,2,2-tetrafluoroethoxy]-  
396 1,1,2,2-tetrafluoro-ethanesulfonic acid) and PFECHS (perfluoro-4-  
397 ethylcyclohexanesulfonate) were detected using previous accurate mass assessment  
398 information. PFAS were detected using a Thermo Orbitrap Fusion mass spectrometer  
399 using heated electrospray ionization in negative mode (Thermo Fisher Scientific,  
400 Waltham, MA, USA). Full scan accurate mass spectra were acquired from 70 to 700 Da  
401 with a resolving power of 120,000 Rs for MS1 and at 30,000 Rs for MS2, and a mass  
402 accuracy of ±5 ppm. Data-dependent acquisition was carried out to acquire MS/MS of  
403 select features at a resolving power of 30000. The ion transfer tube was set at 250°C and  
404 vaporizer temp set at 30 °C. Interference from the tissue matrix prevented the use of the  
405 Fusion internal lock mass in this experimental method. Data acquisition and analysis was  
406 performed using Xcalibur and Compound Discoverer software (Thermo Fisher Scientific,  
407 Waltham, MA, USA).

## 408 **Quality Assurance and Quality Control**

409  
410 Six-point, processed and matrix-matched calibration curves were prepared, one for  
411 each extraction method. Curve preparation entailed taking multiple aliquots of liver

412 tissue (from the same batch of slurried tissue) through each extraction in its entirety.

413 The matrix-matched approach is key to account for the influence or interference of

414 biological co-eluent on PFAS response and derived concentrations<sup>50,51</sup>.

415

416 The UPLC-MS/MS curve points were spiked directly before instrumental analysis with

417 appropriate levels of native and mass-labelled standard, ranging from 0.25-100 ng/ml.

418 The HRMS curve points were spiked before extraction, and therefore recovery-

419 corrected all subsequent quantitation; these curve points ranged from 0.05 -10

420 ng/400µl. The curves were used for quantification of samples prepared with the

421 corresponding extraction method. Organic chicken liver, demonstrated to contain low

422 concentrations of targeted PFAS, was used as the curve matrix. PFOS was consistently

423 found in organic chicken liver samples, and thus the curve was corrected for

424 background levels of PFOS by subtracting the average of measured background

425 samples (n = 6) from PFOS responses measured in curve point samples. All calibration

426 curves used for quantitation demonstrated an  $R^2 \geq 0.98$ , with most demonstrating an  $R^2$

427  $\geq 0.99$ .

428

429 During targeted analysis via UPLC-MS/MS, process blanks were prepared and

430 analyzed with every 10 samples and found to be free of significant contamination;

431 sample concentrations were not blank corrected as a result. Each sample was injected

432 in duplicate, and duplicate injections monitored for stability. Mobile phase blanks (3:1

433 aqueous:organic) were analyzed between duplicate sample injections to monitor for

434 analyte carryover or contamination.

435

436 Five samples consisting of chicken liver spiked with 2 ng of all native compounds were  
437 also prepared and used to calculate accuracy and precision metrics for UPLC-MS/MS.  
438 Accuracy ranged from 18-154% with a mean accuracy of 92%. Precision, calculated as  
439 percent relative standard deviation (% RSD), ranged from 7 – 150 %, with a mean %  
440 RSD of 28% (Table S13). Precision and accuracy were particularly variable for neutral  
441 sulfonamide acetic acids, those compounds lacking an identical mass-labelled  
442 surrogate like PFDS, and the C<sub>13</sub> and C<sub>14</sub> PFCAs.

443

444 Although the matrix-matched curves account for matrix effects in quantitation efforts,  
445 matrix effects were calculated for illustrative purposes following methods described by  
446 Chambers et al. 2008<sup>51</sup>. Matrix calculations indicated variable enhancement or  
447 suppression of each analyte, with an average ion suppression of -20% and an ionization  
448 enhancement of 31% (Table S14).

449 Equation 1: % *Matrix Effects* =  $\left( \left( \frac{\text{Post-extraction spiked matrix}}{\text{Post-extraction spiked solvent}} \right) - 1 \right) \times 100$

450 Method detection limits for UPLC-MS/MS ranged from 0.5 – 4.1 ng/ml based on spiked  
451 replicate samples multiplied by the Student's t-value appropriate for a single-tailed 99th  
452 percentile (Table S15). Method recovery ranged from 14 -112%, with a mean recovery  
453 of 61% across all compounds (Table S6).

454 Equation 2: % *Recovery* =  $\frac{\text{Pre-extraction spiked sample}}{\text{Post-extraction spiked sample}} \times 100$

455 During HRMS analysis, duplicate process blanks using formic acid and acetonitrile were  
456 prepared daily with each sample set, for a total of 8 process blanks. Process blanks

457 were used to identify contamination introduced via sample preparation and instrument  
458 background signal. Mobile phase blanks were injected between different types of  
459 samples to monitor instrumental background noise and any carryover between samples.  
460 No contamination of emerging PFAS was apparent in process blanks; HFPO-DA and  
461 several other legacy PFCAs displayed high levels of instrumental background noise as  
462 displayed in instrumental blanks and process blanks. No significant background noise  
463 was apparent for Nafion BP2, PFO5DoDA, or PFO4DA, the three PFEAs of interest  
464 reported here using HRMS analysis (Table S12). Method recoveries for HRMS were not  
465 tracked; each curve point sample was spiked with appropriate levels of native and  
466 internal standard and then taken through the extraction to create a recovery-corrected  
467 curve for quantification. Samples were analyzed in four batches, and curve stability  
468 monitored between runs. Curve responses at all levels varied less than 4% across all  
469 four runs for the three PFEAs reported using HRMS measurements in this analysis.

470  
471 Quantification of emerging compounds via HRMS was limited to those samples above  
472 the linear range of the calibration curve; the lower detection limit was determined by  
473 comparison to blank values plus three times the standard deviation of blank responses  
474 (Table S12). Reporting of emerging compounds below the curve range or those without  
475 authentic standards is limited to raw abundances in comparison to process and  
476 instrumental blank values (Table S16).

477  
478 PFOS concentrations measured via both HRMS and UPLC-MS/MS were compared for  
479 parity, and were generally found to be within 30% of UPLC-MS/MS results and all were

480 within an order of magnitude. UPLC-MS/MS results were considered more precise due  
481 to lower levels of instrumental background noise along with higher levels of QA/QC and  
482 were therefore used for comparison and statistical analyses for all compounds  
483 excepting Nafion BP2 and PFO5DoDA.

484

### 485 **Stable Isotope Analysis Sample Preparation and Analysis**

486

487 Liver and muscle of seabird chicks were lyophilized, and ground to fineness using a  
488 mortar and pestle. 2-3 mg of tissue was weighed out into tin capsules for carbon and  
489 nitrogen stable isotope analysis, while 3-5 mg of muscle tissue were weighed out for  
490 sulfur isotope analysis.

491

492 Weighed samples were measured via IR-MS analysis, and results interpreted as parts  
493 per thousand relative to appropriate references.  $\delta^{15}\text{N}$  and  $\delta^{13}\text{C}$  were measured using an  
494 Isoprime 100 Isotope Ratio Mass Spectrometer coupled to a Micro Vario Elemental  
495 Analyzer (Elementar Americas, Mt. Laurel, NJ).  $\delta^{34}\text{S}$  was measured by UC Davis Stable  
496 Isotope Laboratory using an Elementar Vario ISOTOPE cube interfaced to a SerCon  
497 20-22 IRMS (Sercon Ltd., Cheshire, UK).

498

499 The nitrogen ( $\delta^{15}\text{N}$ ) isotope composition was expressed as a part per thousand  
500 deviation (‰) from air. Carbon ( $\delta^{13}\text{C}$ ) isotope composition was expressed relative to  
501 Vienna Pee Dee Belemnite where  $\delta X = [(R_{\text{sample}} - R_{\text{standard}})/R_{\text{standard}}] \times 10^3$ , where X is  
502  $\delta^{15}\text{N}$  or  $\delta^{13}\text{C}$ , and R is the ratio of heavy to light isotope (15N: 14N, 13C: 12C).

503 Duplicates were analyzed every 10 samples, and a blue mussel reference material  
504 every 15 samples to ensure measurement quality.

### 505 **Phospholipid analysis**

506  
507 50 mg of liver was homogenized at 4°C in 1 ml phosphate-buffered saline using a  
508 Beadruptor Elite bead mill homogenizer from Omni International. An aliquot of the  
509 homogenate was transferred to a 15ml polypropylene tube, and 3.75 ml of  
510 chloroform:methanol (2:1, v/v) was added. The solution was vortexed, and 0.5 ml  
511 deionized water added, followed by another 15 sec of vortexing. The extract was then  
512 centrifuged at 3000 rpm for 5 min at room temperature, and the organic layer decanted  
513 into a pre-weighed glass vial. The organic extract was allowed to evaporate in a fume  
514 hood overnight, and the remaining lipid residue was then weighed to ascertain total lipid  
515 content. The residue was then re-suspended in 200 µl of 1% Triton X-100 in 100%  
516 ethanol and shaken well for at least two hours. 20 µl of the extract was then pipetted  
517 into a 96-well plate, inoculated with phospholipid kit working reagent, and assessed  
518 colorimetrically using a Spectramax M2 Multi-Mode microplate reader for phospholipid  
519 content via comparison to a 4-point curve containing 0-200 µM phosphatidylcholine<sup>52</sup>.

520

### 521 **More detail about stable isotope values and relationships**

522  
523 There is limited fine-scale comparability between stable isotope measurements between  
524 habitats included in this study, due to the species and food web specific nature of  
525 isotope fractionation factors, alongside inevitable and stark differences in isotopic  
526 composition at the base of each food web. As a result, here we focus on associations



527 between PFAS concentrations and stable isotope measurements *within* each habitat,  
528 rather than considering isotope ratios across the sample set as a whole. Likewise, we  
529 apply previously described trophic level calculations to measurements within each  
530 habitat for illustrative purposes, noting that bulk trophic level calculations uncoupled  
531 from food-web specific data lack fine-scale insight.

532

533 Summary statistics associated with stable isotope analysis (SIA) of each tissue are  
534 presented in Table S20; a three-dimensional presentation of all SIA data can be found  
535 here [<http://rpubs.com/Arobuck/555350>].

536

537 Herring Gulls from Narragansett Bay evidenced the widest range of  $\delta^{15}\text{N}$ , while  
538 Shearwaters from Massachusetts Bay displayed the least variability in  $\delta^{15}\text{N}$  (Table S21).  
539 Derived trophic level estimates reflected the same patterns of variability, with all birds  
540 evidencing an estimated trophic level between 3.24 – 4.59 based on liver  $\delta^{15}\text{N}$  (Table  
541 S20, S21). Trophic level estimates assumed a calanoid copepod primary consumer, a  
542 realistic assumption for all habitats.  $\delta^{15}\text{N}$  values and calculated trophic level were not  
543 significantly associated with concentrations of most individual PFAS or  $\sum_{19}\text{PFAS}$  in each  
544 habitat. PFOS and  $\sum_{19}\text{PFAS}$  were positively associated with  $\delta^{15}\text{N}$  only in Massachusetts  
545 Bay individuals (Table S23). The lack of more significant associations with  $\delta^{15}\text{N}$  may be  
546 related to similar trophic strategies and prey items utilized by birds included in this study,  
547 resulting in a limited range of  $\delta^{15}\text{N}$  (Tables S21, S23). The lack of association likely also  
548 relates to the unique partitioning and accumulation pathways governing PFAS distribution  
549 in biota compared to legacy POPs <sup>11,53</sup>.

550

551 Muscle  $\delta^{34}\text{S}$  was also compared to concentrations of individual PFAS and  $\Sigma\text{PFAS}$ .

552 Muscle  $\delta^{34}\text{S}$  was only associated with PFUnDA in Narra. Bay individuals; no other  
553 statistically significant or observationally notable associations were present between  
554  $\delta^{34}\text{S}$  and PFAS concentrations.

555

556  $\delta^{13}\text{C}$  and PFAS concentrations were most notably associated in birds from the CFRE.

557 The association between  $\delta^{13}\text{C}$  and PFAS levels in CFRE chicks is likely a function of the  
558 marine and estuarine foraging habits of species included in this study, coupled to the local  
559 geomorphology of the CFRE system. Seabird parents foraging in the CFRE or in the  
560 adjacent coastal plume likely obtained resources comparatively enriched in  $\delta^{13}\text{C}$  due to  
561 the abundance of *Sporobolus alterniflora* marshes in the CFRE lower estuary. These  
562 marshes make up a substantial portion of the undeveloped land area of the lower estuary  
563 and serve as habitat and nursery area for ecologically and commercially important fish  
564 and invertebrates<sup>54,55</sup>. *Sporobolus alterniflora* typically reflects an enriched  $\delta^{13}\text{C}$  value of  
565  $-13.6\text{‰}$ <sup>56</sup>, compared to more depleted  $\delta^{13}\text{C}$  ratios observed in offshore food webs based  
566 on particulate organic matter and phytoplankton ( $-20\text{‰}$  to  $-26\text{‰}$ <sup>57,58</sup>) (Fig. S6).  
567 *Sporobolus alterniflora* marshes inhabit geomorphically protected inshore lagoon and  
568 barrier island environments in the CFRE, and were physically closer to upstream PFAS  
569 sources. Therefore, they were subject to less open-water dilution, likely increasing PFAS  
570 exposure potential for prey and predators reliant on these marsh systems. Surface water  
571 studies support this hypothesis, with predictable inverse relationships between salinity  
572 and surface water  $\Sigma\text{PFAS}$  apparent in estuarine<sup>59</sup>, coastal shelf, and slope<sup>60</sup>

573 environments. This suggests an increased potential for PFAS exposure in terrestrially-  
574 influenced environments like estuaries or brackish marshes. CFRE seabird parents also  
575 likely had an incentive to forage as close as possible to estuarine nesting colonies to  
576 conserve energy, further encouraging reliance on marsh and estuary resources. Seabird  
577 parents utilizing more offshore, marine systems for chick provisioning were likely foraging  
578 in environments with increased dilution and mixing, obtaining larger prey with decreased  
579 PFAS levels and a more depleted  $\delta^{13}\text{C}$  signature.

### 580 **Bioaccumulation factors**

581  
582 Liver-water bioaccumulation factors (BAFs) were calculated by dividing liver geometric  
583 mean PFAS levels by measured or estimated surface water concentrations adjacent to  
584 nesting or collection locations, followed by log transformation. Water values for  
585 Massachusetts Bay and Narragansett Bay were derived from unpublished data from the  
586 Lohmann lab, while surface water estimates for the CFRE were estimated using data  
587 inputs from Zhang et al. 2019, assuming a conservation of mass dilution approach and  
588 estimating salinity near the collection site at M18 using salinity data from the Lower  
589 Cape Fear River Program (Tables S18-S19)<sup>61,62</sup>.

590  
591 BAFs reported here range from 0.5 – 3.7, with PFOS, PFNA, PFDA, PFO5DoDA, and  
592 Nafion BP2 displaying BAFs near or above 2 variably across the three habitats sampled  
593 in this study (Fig. S9). BAFs above 3.3 are considered “bioaccumulative” under  
594 regulatory protocol designed for persistent organic pollutants<sup>63</sup>.

595

596

597 **Miscellaneous Supporting Figures**

598  
599

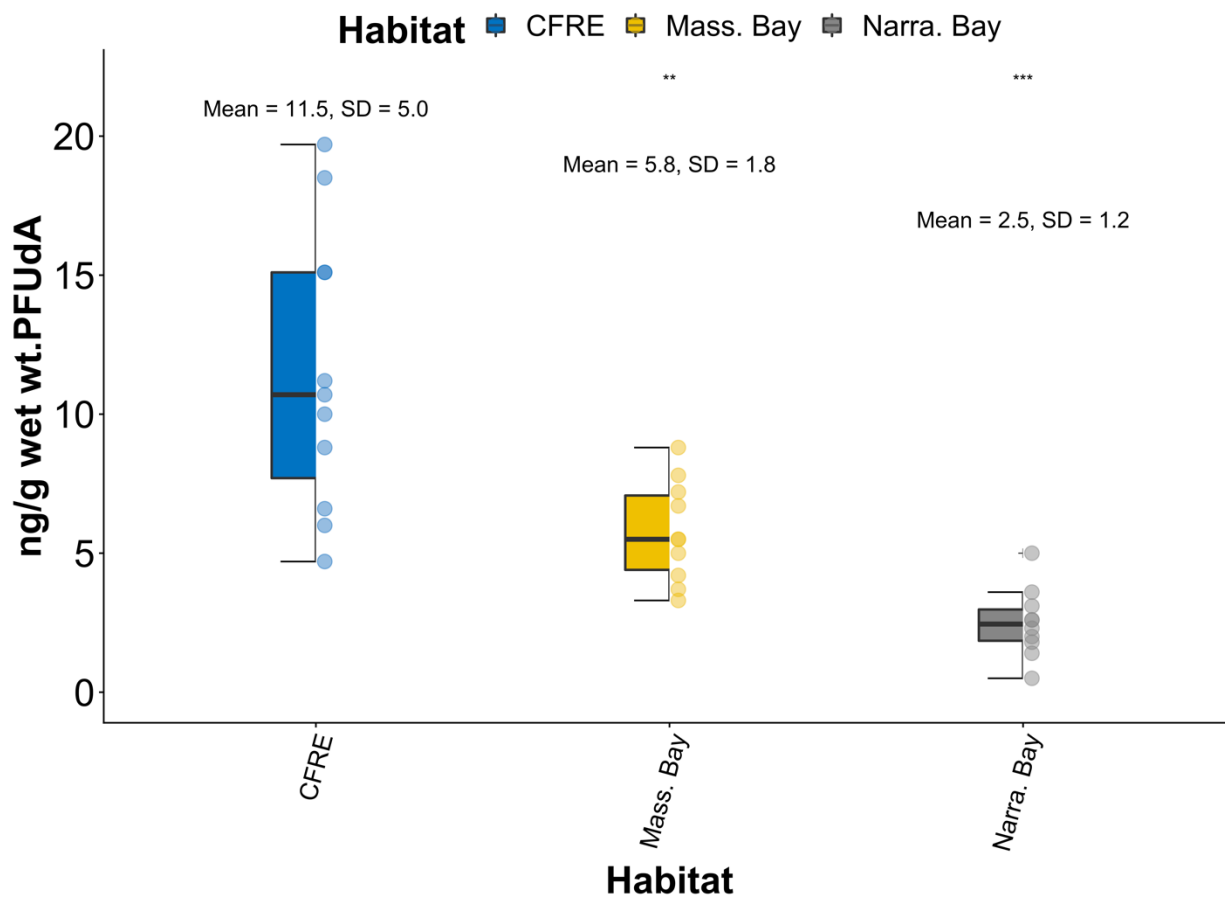

600

601

602 *Figure S2. Concentrations of PFUnDA by habitat.* Habitat mean concentrations of  
603 PFUnDA presented as boxplots, with the dark line representing the median, box limits  
604 representing the first and third quartiles, whiskers denoting 1.5 times the interquartile  
605 range, and crosses denoting outliers. The points reflect measured observations  
606 contributing to the summary statistics presented by the boxplot. The asterisks indicate a  
607 statistically significant difference between habitat mean PFUnDA compared via the  
608 Wilcoxon rank sum test, using the CFRE group as the reference group.

609

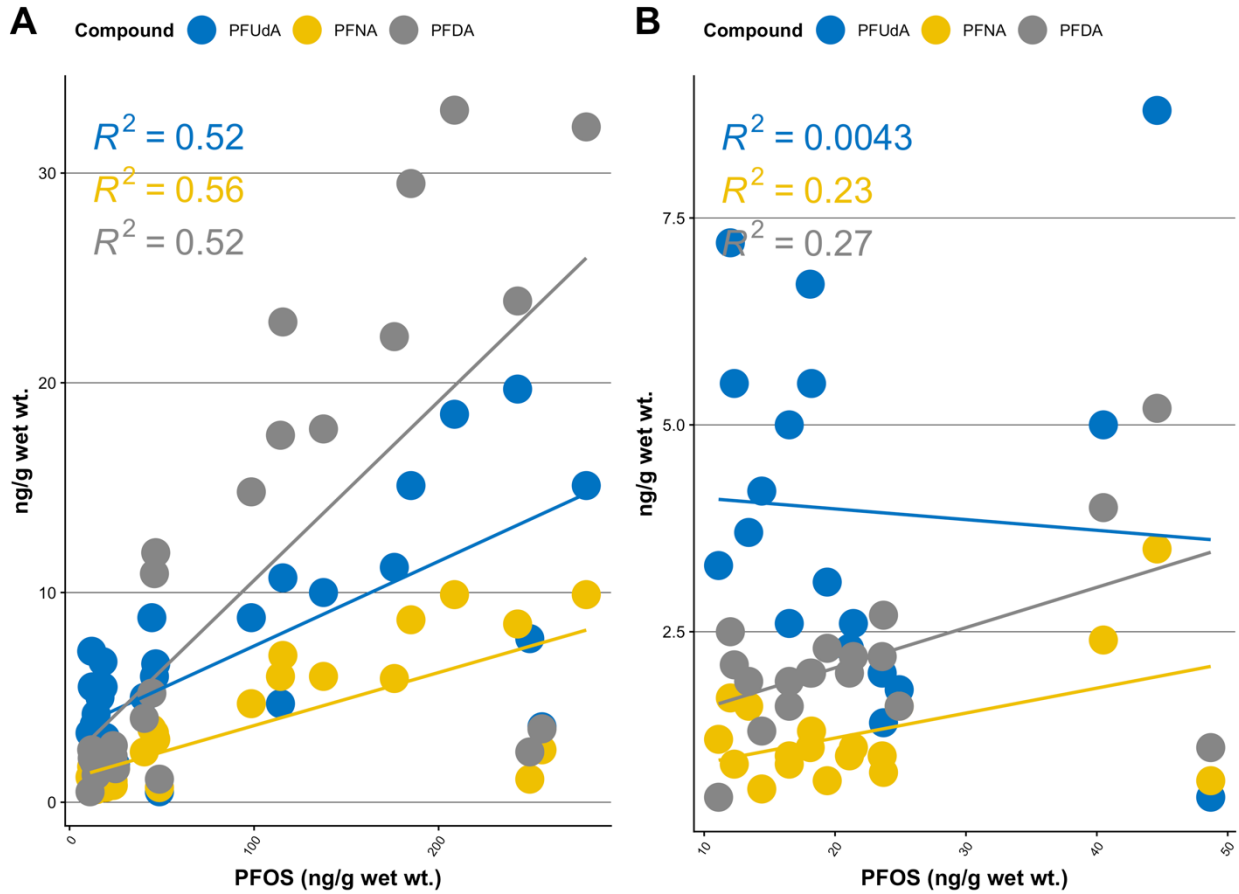

610

611 *Figure. S3. Observed concentrations of PFOS versus concentrations of PFNA,*

612 *PFDA, and PFUnDA in A) all individuals across three habitats, and B) in only*

613 *individuals from Narragansett Bay and Massachusetts Bay with two outlier individuals*

614 *removed. All concentrations were measured via UPLC-MS/MS.*

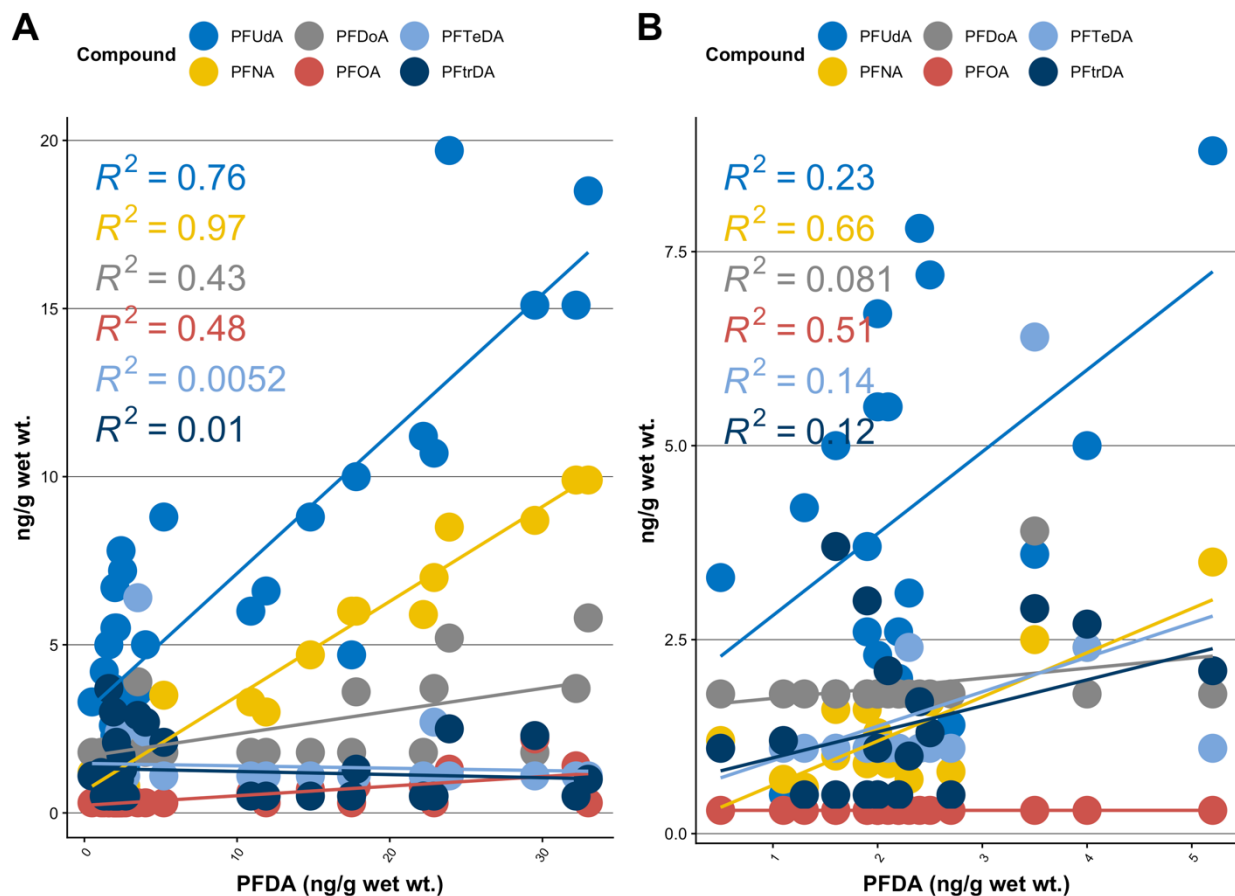

615

616 *Figure S4. Concentrations of C8 – C14 PFCAs as a function of PFDA measured*  
 617 *via LC-MS/MS in A) all individuals across three habitats, and B) in only individuals from*  
 618 *Narragansett Bay and Massachusetts Bay. Associations between PFCAs as*  
 619 *approximated by linear regression slightly decrease without CFRE data included, likely*  
 620 *due to the truncation of the data range as a result of more similar concentrations*  
 621 *observed in habitats removed from point sources and inclusion of MDL/2 values.*

622

623

624

625

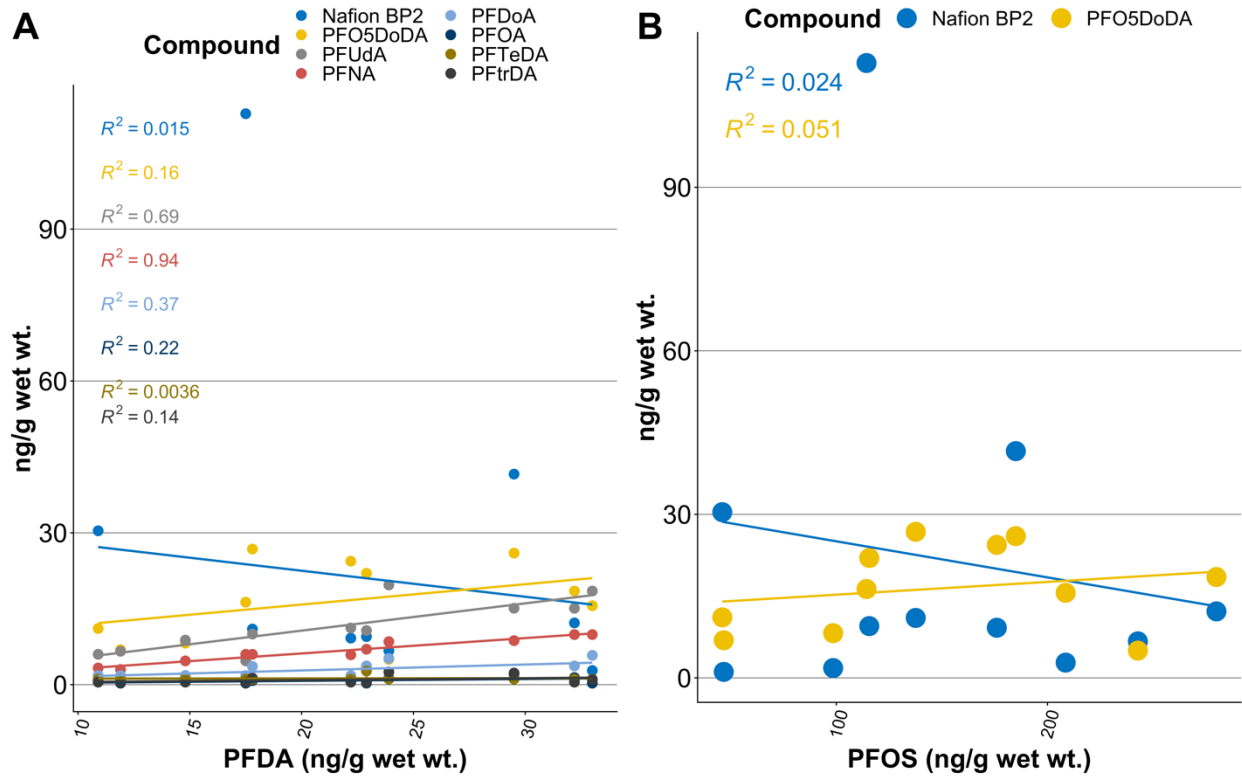

626

627 *Figure. S5. Observed concentrations of emerging PFEAs versus legacy PFAS in*

628 *CFRE chicks with A) displaying concentrations of PFDA vs PFEAs and other long-*

629 *chain PFCAs, and B) displaying concentrations of PFOS vs PFEAs. PFCA and PFSA*

630 *concentrations were measured via UPLC-MS/MS while PFEAs were measured via*

631 *HRMS.*

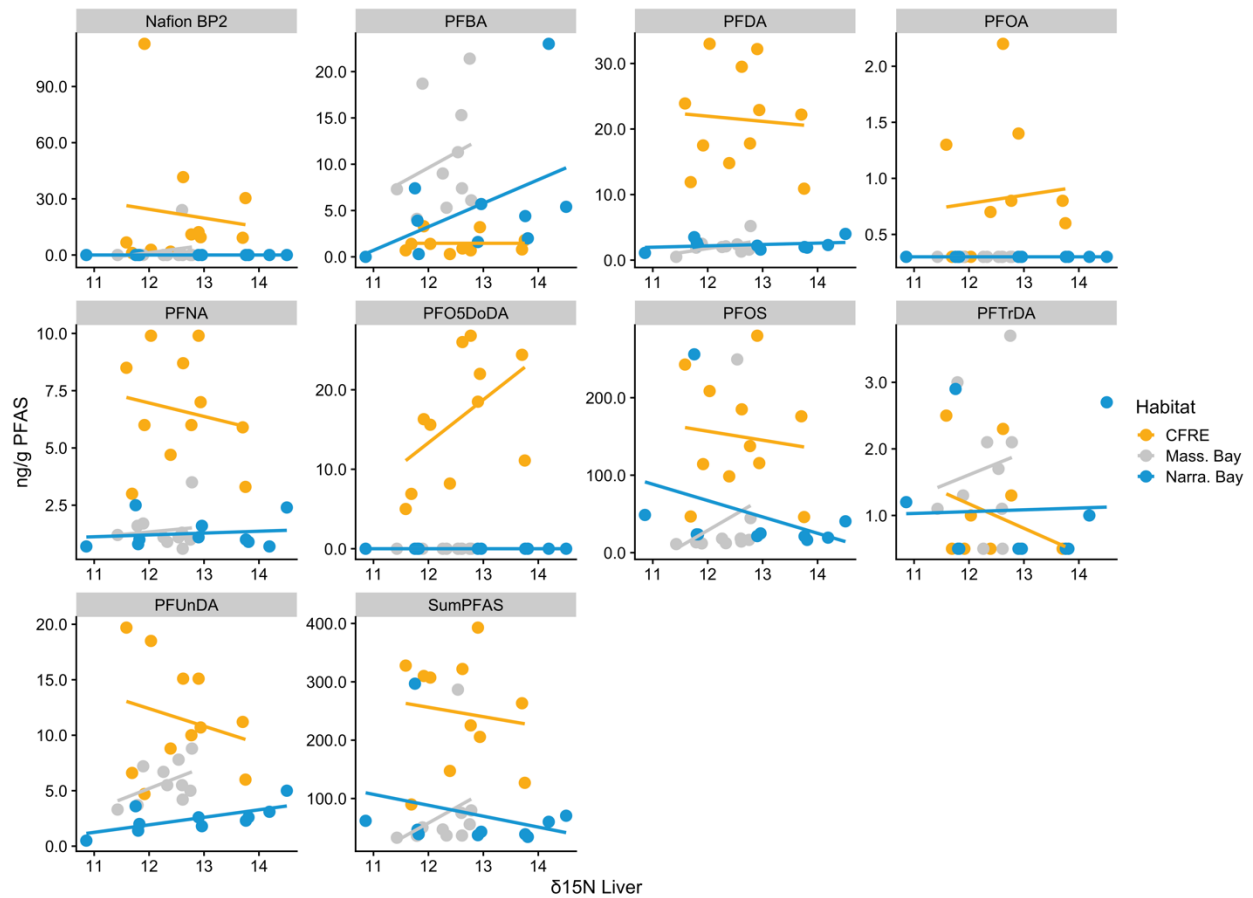

632

633 *Figure S6.  $\delta^{15}N$  vs concentrations of PFAS. Measured  $\delta^{15}N$  in seabird liver and*  
 634 *muscle did not relate to concentrations of individual PFAS, or  $^{19}\Sigma$ PFAS in seabird liver*  
 635 *across any habitat. No correlation was found when the total sample set ( $n = 31$ ) was*  
 636 *assessed in the same way. Muscle  $\delta^{15}N$  ratios are presented here; facet plots include*  
 637 *only those compounds found in >40% of the sample set.*



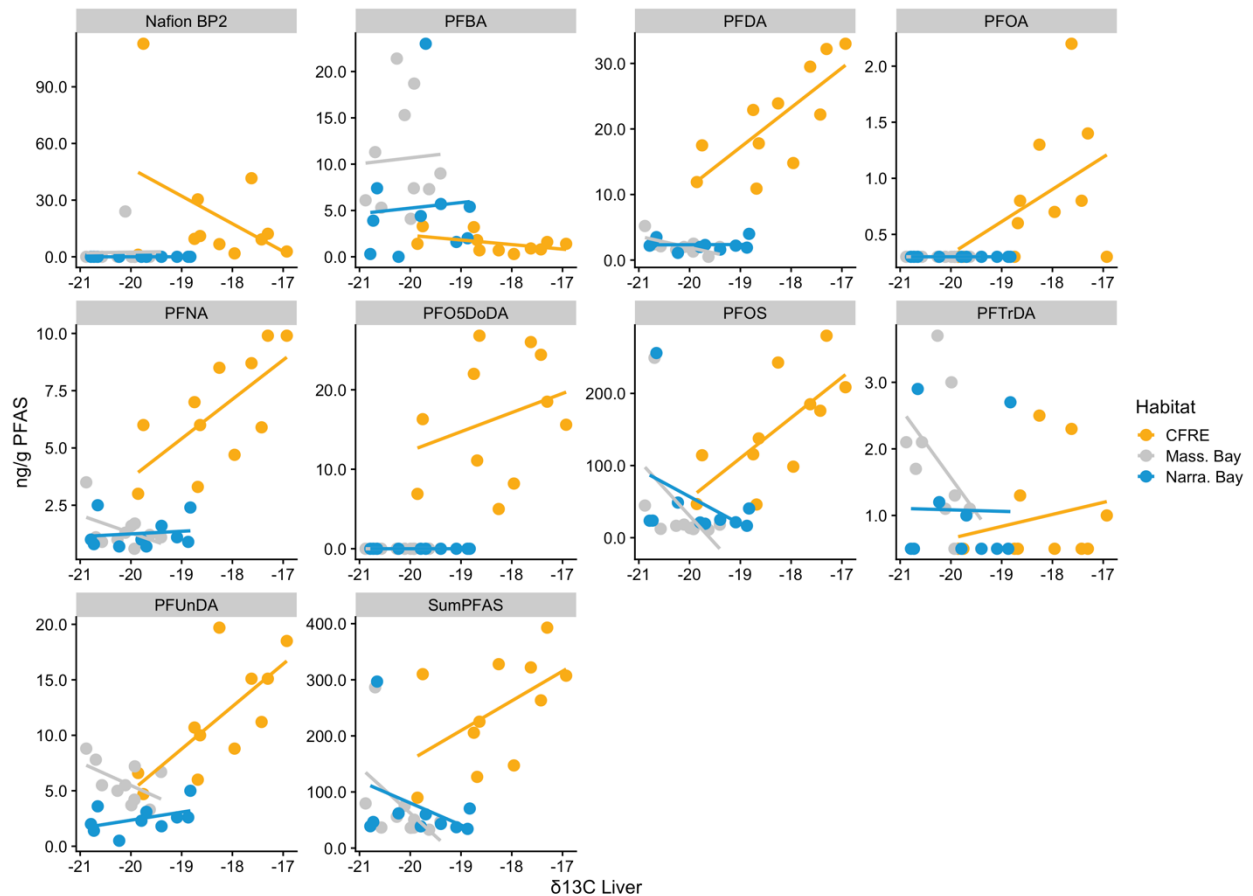

638

639 *Figure S7.  $\delta^{13}\text{C}$  vs concentrations of PFAS. Measured  $\delta^{13}\text{C}$  in seabird liver and*  
 640 *muscle did not relate to concentrations of individual PFAS, or  $^{19}\Sigma\text{PFAS}$  in seabird liver*  
 641 *from Massachusetts Bay or Narragansett Bay. No correlation was found when the total*  
 642 *sample set (n = 31) was assessed in the same way. PFDA, PFNA, PFOS, PFUnDA,*  
 643 *and  $^{19}\Sigma\text{PFAS}$  were moderately associated (p < 0.05) with  $\delta^{13}\text{C}$  ratios, only in CFRE*  
 644 *chicks. See SI text for further discussion of this limited phenomenon. Muscle  $\delta^{13}\text{C}$  ratios*  
 645 *are presented here; facet plots include only those compounds found in >40% of the*  
 646 *sample set.*

647

648

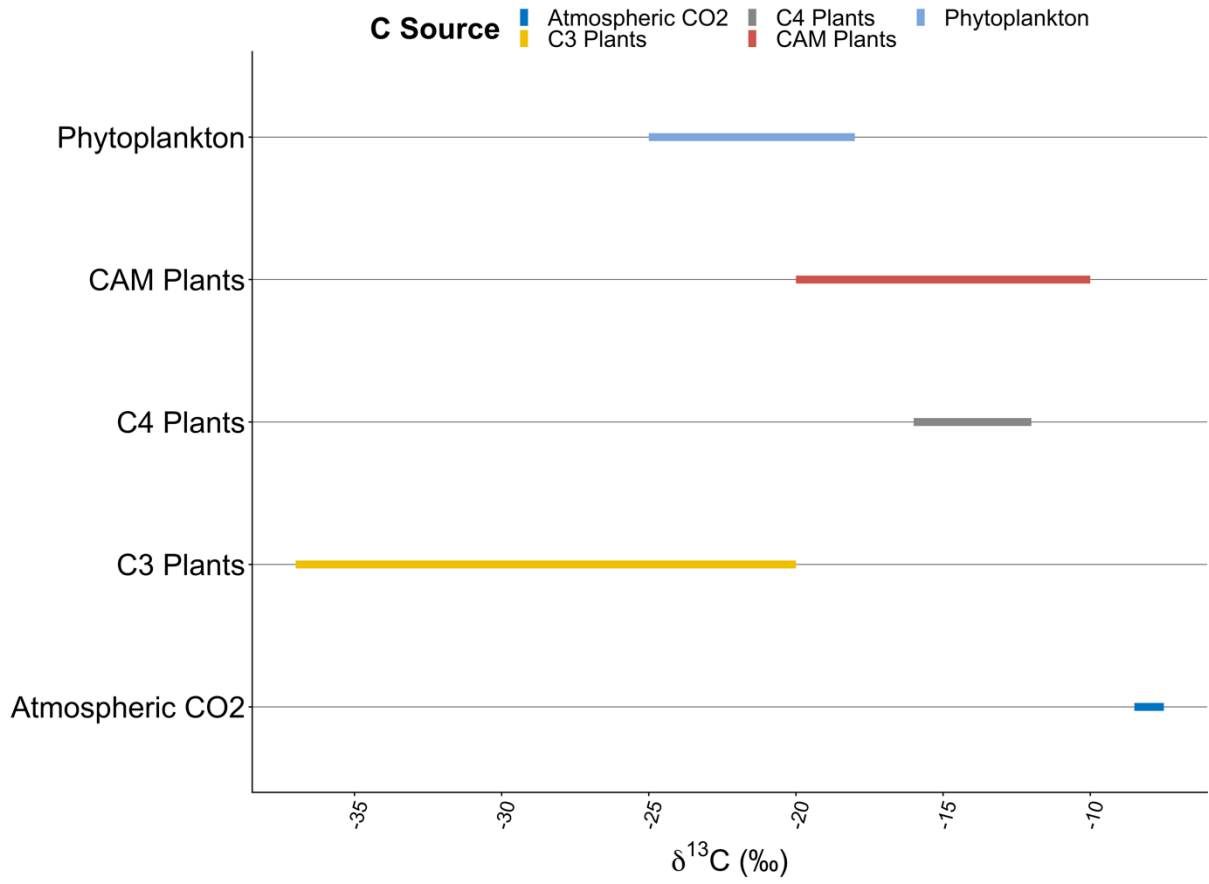

649

650

651 *Figure S8. δ<sup>13</sup>C in key organic and inorganic matrices.*

652

653

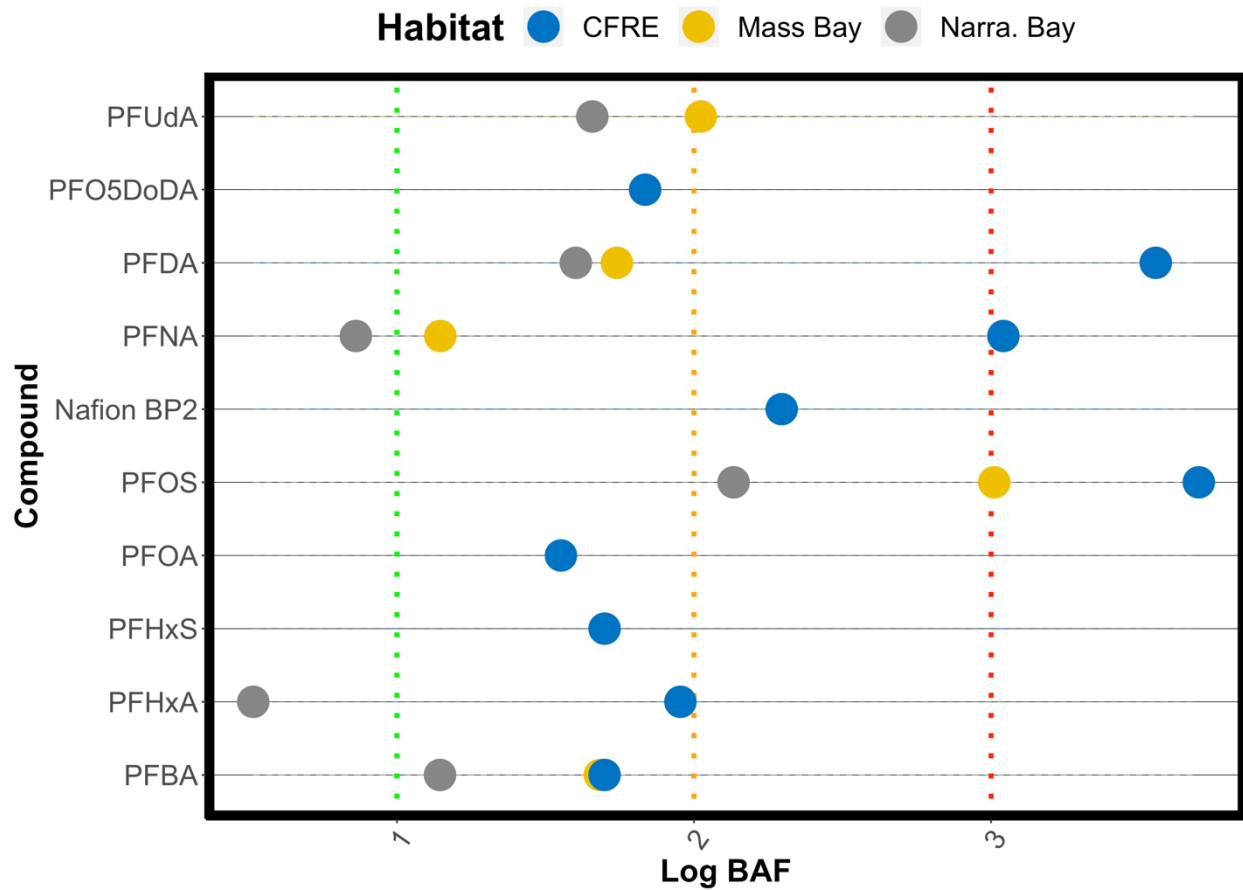

654

655 *Figure S9. Log BAFs for 10 compounds across three habitats. BAFs were*  
 656 *calculated by dividing mean liver concentrations observed in each habitat by observed*  
 657 *or estimated surface water concentrations.*

658

659

660

661

662

663

664

665



677 **Tables**

678

679 See tabs contained in Excel file "PFAS in Seabird Liver\_Final.xlsx"

680

681 **References**

- 682 (1) Giesy, J. P.; Kannan, K. Global Distribution of Perfluorooctane Sulfonate in  
683 Wildlife Global Distribution of Perfluorooctane Sulfonate in Wildlife. *Environ. Sci.*  
684 *Technol.* **2001**, 35 (March), 1339–1342. <https://doi.org/10.1021/es001834k>.
- 685 (2) Kannan, K.; Franson, J. C.; Bowerman, W. W.; Hansen, K. J.; Jones, P. D.;  
686 Giesy, J. P. Perfluorooctane Sulfonate in Fish-Eating Water Birds Including Bald  
687 Eagles and Albatrosses. *Environ. Sci. Technol.* **2001**, 35 (15), 3065–3070.  
688 <https://doi.org/10.1021/es001935i>.
- 689 (3) Braune, B. M.; Letcher, R. J. Perfluorinated Sulfonate and Carboxylate  
690 Compounds in Eggs of Seabirds Breeding in the Canadian Arctic: Temporal  
691 Trends (1975-2011) and Interspecies Comparison. *Environ. Sci. Technol.* **2013**,  
692 47 (1), 616–624. <https://doi.org/10.1021/es303733d>.
- 693 (4) Letcher, R. J.; Su, G.; Moore, J. N.; Williams, L. L.; Martin, P. A.; De Solla, S. R.;  
694 Bowerman, W. W.; Solla, S. R. De; Bowerman, W. W. Perfluorinated Sulfonate  
695 and Carboxylate Compounds and Precursors in Herring Gull Eggs from across  
696 the Laurentian Great Lakes of North America: Temporal and Recent Spatial  
697 Comparisons and Exposure Implications. *Sci. Total Environ.* **2015**, 538 (August),  
698 468–477. <https://doi.org/10.1016/j.scitotenv.2015.08.083>.
- 699 (5) Miller, A.; Elliott, J. E.; Elliott, K. H.; Lee, S.; Cyr, F. Temporal Trends of  
700 Perfluoroalkyl Substances (PFAS) in Eggs of Coastal and Offshore Birds:  
701 Increasing PFAS Levels Associated with Offshore Bird Species Breeding on the  
702 Pacific Coast of Canada and Wintering near Asia. *Environ. Toxicol. Chem.* **2015**,  
703 34 (8), 1799–1808. <https://doi.org/10.1002/etc.2992>.
- 704 (6) Miller, A.; Elliott, J. E.; Wilson, L. K.; Elliott, K. H.; Drouillard, K. G.; Verreault, J.;  
705 Lee, S.; Idrissi, A. Influence of Overwinter Distribution on Exposure to Persistent  
706 Organic Pollutants (POPs) in Seabirds, Ancient Murrelets (*Synthliboramphus*  
707 *Antiquus*), Breeding on the Pacific Coast of Canada. *Environ. Pollut.* **2019**,  
708 113842. <https://doi.org/10.1016/j.envpol.2019.113842>.
- 709 (7) Kannan, K.; Choi, J. W.; Iseki, N.; Senthilkumar, K.; Hoon, D.; Masunaga, S.;  
710 Giesy, J. P.; Kim, D. H.; Masunaga, S.; Giesy, J. P. Concentrations of  
711 Perfluorinated Acids in Livers of Birds from Japan and Korea. *Chemosphere*  
712 **2002**, 49 (3), 225–231. [https://doi.org/10.1016/S0045-6535\(02\)00304-1](https://doi.org/10.1016/S0045-6535(02)00304-1).
- 713 (8) Lopez-Antia, A.; Dauwe, T.; Meyer, J.; Maes, K.; Bervoets, L.; Eens, M. High  
714 Levels of PFOS in Eggs of Three Bird Species in the Neighbourhood of a Fluoro-  
715 Chemical Plant. *Ecotoxicol. Environ. Saf.* **2020**, 139 (August 2016), 165–171.  
716 <https://doi.org/10.1016/j.ecoenv.2017.01.040>.
- 717 (9) Newsted, J. L.; Coady, K. K.; Beach, S. A.; Butenhoff, J. L.; Gallagher, S.; Giesy,  
718 J. P. Effects of Perfluorooctane Sulfonate on Mallard and Northern Bobwhite  
719 Quail Exposed Chronically via the Diet. *Environ. Toxicol. Pharmacol.* **2007**, 23 (1),  
720 1–9. <https://doi.org/10.1016/j.etap.2006.04.008>.
- 721 (10) Newsted, J. L.; Beach, S. A.; Gallagher, S. P.; Giesy, J. P. Acute and Chronic

- 722 Effects of Perfluorobutane Sulfonate (PFBS) on the Mallard and Northern  
723 Bobwhite Quail. *Arch. Environ. Contam. Toxicol.* **2008**, *54* (3), 535–545.  
724 <https://doi.org/10.1007/s00244-007-9039-8>.
- 725 (11) Roscales, J. L.; Vicente, A.; Ryan, P. G.; González-Solís, J.; Jiménez, B. Spatial  
726 and Interspecies Heterogeneity in Concentrations of Perfluoroalkyl Substances  
727 (PFASs) in Seabirds of the Southern Ocean. *Environ. Sci. Technol.* **2019**, *53* (16),  
728 9855–9865. <https://doi.org/10.1021/acs.est.9b02677>.
- 729 (12) Galatius, A.; Bossi, R.; Sonne, C.; Rigét, F. F.; Kinze, C. C.; Lockyer, C.;  
730 Teilmann, J.; Dietz, R. PFAS Profiles in Three North Sea Top Predators:  
731 Metabolic Differences among Species? *Environ. Sci. Pollut. Res.* **2013**, *20* (11),  
732 8013–8020. <https://doi.org/10.1007/s11356-013-1633-x>.
- 733 (13) Letcher, R. J.; Chu, S.; McKinney, M. A.; Tomy, G. T.; Sonne, C.; Dietz, R.  
734 Comparative Hepatic in Vitro Depletion and Metabolite Formation of Major  
735 Perfluorooctane Sulfonate Precursors in Arctic Polar Bear, Beluga Whale, and  
736 Ringed Seal. *Chemosphere* **2014**, *112*, 225–231.  
737 <https://doi.org/10.1016/j.chemosphere.2014.04.022>.
- 738 (14) Dassuncao, C.; Hu, X. C.; Zhang, X.; Bossi, R.; Dam, M.; Mikkelsen, B.;  
739 Sunderland, E. M. Temporal Shifts in Poly- and Perfluoroalkyl Substances  
740 (PFASs) in North Atlantic Pilot Whales Indicate Large Contribution of Atmospheric  
741 Precursors. *Environ. Sci. Technol.* **2017**, *51* (8), 4512–4521.  
742 <https://doi.org/10.1021/acs.est.7b00293>.
- 743 (15) Lynch, K. M.; Fair, P. A.; Houde, M.; Muir, D. C. G.; Kannan, K.; Bossart, G. D.;  
744 Bartell, S. M.; Gribble, M. O. Temporal Trends in Per- and Polyfluoroalkyl  
745 Substances in Bottlenose Dolphins (*Tursiops Truncatus*) of Indian River Lagoon,  
746 Florida and Charleston, South Carolina. *Environ. Sci. Technol.* **2019**, *53* (24),  
747 14194–14203. <https://doi.org/10.1021/acs.est.9b04585>.
- 748 (16) Houde, M.; Wells, R. S.; Fair, P. A.; Bossart, G. D.; Hohn, A. A.; Rowles, T. K.;  
749 Sweeney, J. C.; Solomon, K. R.; Muir, D. C. G. Polyfluoroalkyl Compounds in  
750 Free-Ranging Bottlenose Dolphins (*Tursiops Truncatus*) from the Gulf of Mexico  
751 and the Atlantic Ocean. *Environ. Sci. Technol.* **2005**, *39* (17), 6591–6598.  
752 <https://doi.org/10.1021/es0506556>.
- 753 (17) Pizzurro, D. M.; Seeley, M.; Kerper, L. E.; Beck, B. D. Interspecies Differences in  
754 Perfluoroalkyl Substances (PFAS) Toxicokinetics and Application to Health-Based  
755 Criteria. *Regul. Toxicol. Pharmacol.* **2019**, *106* (May), 239–250.  
756 <https://doi.org/10.1016/j.yrtph.2019.05.008>.
- 757 (18) Tarazona, J. V.; Rodríguez, C.; Alonso, E.; Sáez, M.; González, F.; San Andrés,  
758 M. D.; Jiménez, B.; San Andrés, M. I. Toxicokinetics of Perfluorooctane Sulfonate  
759 in Birds under Environmentally Realistic Exposure Conditions and Development  
760 of a Kinetic Predictive Model. *Toxicol. Lett.* **2015**, *232* (2), 363–368.  
761 <https://doi.org/10.1016/j.toxlet.2014.11.022>.
- 762 (19) Heuvel, J. P. V.; Kuslikis, B. I.; Van Rafelghem, M. J.; Peterson, R. E. Tissue  
763 Distribution, Metabolism, and Elimination of Perfluorooctanoic Acid in Male and  
764 Female Rats. *J. Biochem. Toxicol.* **1991**, *6* (2), 83–92.  
765 <https://doi.org/10.1002/jbt.2570060202>.
- 766 (20) Holmström, K. E.; Berger, U. Tissue Distribution of Perfluorinated Surfactants in  
767 Common Guillemot (*Uria Aalge*) from the Baltic Sea. *Environ. Sci. Technol.* **2008**,

- 768 42 (16), 5879–5884. <https://doi.org/10.1021/es800529h>.
- 769 (21) Armitage, J. M.; Arnot, J. A.; Wania, F. Potential Role of Phospholipids in  
770 Determining the Internal Tissue Distribution of Perfluoroalkyl Acids in Biota.  
771 *Environ. Sci. Technol.* **2012**, *46* (22), 12285–12286.  
772 <https://doi.org/10.1021/es304430r>.
- 773 (22) Ng, C. A.; Hungerbühler, K. Bioaccumulation of Perfluorinated Alkyl Acids:  
774 Observations and Models. *Environ. Sci. Technol.* **2014**, *48* (9), 4637–4648.  
775 <https://doi.org/10.1021/es404008g>.
- 776 (23) Ng, C. A.; Hungerbühler, K. Bioconcentration of Perfluorinated Alkyl Acids: How  
777 Important Is Specific Binding? *Environ. Sci. Technol.* **2013**, *47* (13), 7214–7223.  
778 <https://doi.org/10.1021/es400981a>.
- 779 (24) Fenton, S. E.; Reiner, J. L.; Nakayama, S. F.; Delinsky, A. D.; Stanko, J. P.;  
780 Hines, E. P.; White, S. S.; Lindstrom, A. B.; Strynar, M. J.; Petropoulou, S. E.  
781 Analysis of PFOA in Dosed CD-1 Mice. Part 2: Disposition of PFOA in Tissues  
782 and Fluids from Pregnant and Lactating Mice and Their Pups. *Reprod. Toxicol.*  
783 **2009**, *27* (3–4), 365–372.  
784 <https://doi.org/10.1161/CIRCULATIONAHA.110.956839>.
- 785 (25) Entenman, C. Lipid Content of Chick Tissues. *J Biol Chem* **1940**, No. 65, 231–  
786 241.
- 787 (26) Cuthbert, R. J. Breeding Biology, Chick Growth and Provisioning of Great  
788 Shearwaters (*Puffinus Gravis*) at Gough Island, South Atlantic Ocean. *Emu* **2005**,  
789 *105* (4), 305–310. <https://doi.org/10.1071/MU05036>.
- 790 (27) Yoo, H.; Guruge, K. S.; Yamanaka, N.; Sato, C.; Mikami, O.; Miyazaki, S.;  
791 Yamashita, N.; Giesy, J. P. Depuration Kinetics and Tissue Disposition of PFOA  
792 and PFOS in White Leghorn Chickens (*Gallus Gallus*) Administered by  
793 Subcutaneous Implantation. *Ecotoxicol. Environ. Saf.* **2009**, *72* (1), 26–36.  
794 <https://doi.org/10.1016/j.ecoenv.2007.09.007>.
- 795 (28) Verreault, J.; Houde, M.; Gabrielsen, G. W.; Berger, U.; Haukås, M.; Letcher, R.  
796 J.; Muir, D. C. G. Perfluorinated Alkyl Substances in Plasma, Liver, Brain, and  
797 Eggs of Glaucous Gulls (*Larus Hyperboreus*) from the Norwegian Arctic. *Environ.*  
798 *Sci. Technol.* **2005**, *39* (19), 7439–7445. <https://doi.org/10.1021/es051097y>.
- 799 (29) Gebbink, W. A.; Letcher, R. J. Comparative Tissue and Body Compartment  
800 Accumulation and Maternal Transfer to Eggs of Perfluoroalkyl Sulfonates and  
801 Carboxylates in Great Lakes Herring Gulls. *Environ. Pollut.* **2012**, *162*, 40–47.  
802 <https://doi.org/10.1016/j.envpol.2011.10.011>.
- 803 (30) Ahrens, L.; Siebert, U.; Ebinghaus, R. Total Body Burden and Tissue Distribution  
804 of Polyfluorinated Compounds in Harbor Seals (*Phoca Vitulina*) from the German  
805 Bight. *Mar. Pollut. Bull.* **2009**, *58* (4), 520–525.  
806 <https://doi.org/10.1016/j.marpolbul.2008.11.030>.
- 807 (31) Borg, D.; Bogdanska, J.; Sundström, M.; Nobel, S.; Håkansson, H.; Bergman, Å.;  
808 DePierre, J. W.; Halldin, K.; Bergström, U. Tissue Distribution of <sup>35</sup>S-Labelled  
809 Perfluorooctane Sulfonate (PFOS) in C57Bl/6 Mice Following Late Gestational  
810 Exposure. *Reprod. Toxicol.* **2010**, *30* (4), 558–565.  
811 <https://doi.org/10.1016/j.reprotox.2010.07.004>.
- 812 (32) Wang, J.; Caccamise, S. A. L.; Woodward, L. A.; Li, Q. X. L. Polychlorinated  
813 Biphenyls in the Plasma and Preen Oil of Black-Footed Albatross (*Diomedea*

- 814 Nigripes) Chicks and Adults on Midway Atoll, North Pacific Ocean. *PLoS One*  
815 **2015**, *10* (4), 1–12. <https://doi.org/10.1371/journal.pone.0123041>.
- 816 (33) Mondal, D.; Lopez-Espinosa, M. J.; Armstrong, B.; Stein, C. R.; Fletcher, T.  
817 Relationships of Perfluorooctanoate and Perfluorooctane Sulfonate Serum  
818 Concentrations between Mother-Child Pairs in a Population with  
819 Perfluorooctanoate Exposure from Drinking Water. *Environ. Health Perspect.*  
820 **2012**, *120* (5), 752–757. <https://doi.org/10.1289/ehp.1104538>.
- 821 (34) Houde, M.; Balmer, B. C.; Brandsma, S.; Wells, R. S.; Rowles, T. K.; Solomon, K.  
822 R.; Muir, D. C. G. Perfluoroalkyl Compounds in Relation to Life-History and  
823 Reproductive Parameters in Bottlenose Dolphins (*Tursiops Truncatus*) from  
824 Sarasota Bay, Florida, USA. *Environ. Toxicol. Chem.* **2006**, *25* (9), 2405–2412.  
825 <https://doi.org/10.1897/05-499R.1>.
- 826 (35) Baduel, C.; Lai, F. Y.; Townsend, K.; Mueller, J. F. Size and Age-Concentration  
827 Relationships for Perfluoroalkyl Substances in Stingray Livers from Eastern  
828 Australia. *Sci. Total Environ.* **2014**, *496*, 523–530.  
829 <https://doi.org/10.1016/j.scitotenv.2014.07.010>.
- 830 (36) Wang, J.; Zhang, Y.; Zhang, F.; Yeung, L. W. Y.; Taniyasu, S.; Yamazaki, E.;  
831 Wang, R.; Lam, P. K. S.; Yamashita, N.; Dai, J. Age- and Gender-Related  
832 Accumulation of Perfluoroalkyl Substances in Captive Chinese Alligators (*Alligator*  
833 *Sinensis*). *Environ. Pollut.* **2013**, *179*, 61–67.  
834 <https://doi.org/10.1016/j.envpol.2013.04.020>.
- 835 (37) Cui, Q.; Pan, Y.; Zhang, H.; Sheng, N.; Wang, J.; Guo, Y.; Dai, J. Occurrence and  
836 Tissue Distribution of Novel Perfluoroether Carboxylic and Sulfonic Acids and  
837 Legacy Per/Polyfluoroalkyl Substances in Black-Spotted Frog (*Pelophylax*  
838 *Nigromaculatus*). *Environ. Sci. Technol.* **2018**, *52* (3), 982–990.  
839 <https://doi.org/10.1021/acs.est.7b03662>.
- 840 (38) Lasters, R.; Groffen, T.; Lopez-Antia, A.; Bervoets, L.; Eens, M. Variation in PFAA  
841 Concentrations and Egg Parameters throughout the Egg-Laying Sequence in a  
842 Free-Living Songbird (the Great Tit, *Parus Major*): Implications for Biomonitoring  
843 Studies. *Environ. Pollut.* **2019**, *246* (2019), 237–248.  
844 <https://doi.org/10.1016/j.envpol.2018.12.014>.
- 845 (39) Powers, K. D.; Wiley, D. N.; Allyn, A. J.; Welch, L.; Ronconi, R. A. Movements  
846 and Foraging Areas of Great Shearwaters in the Gulf of Maine. *Mar. Ecol. Prog.*  
847 *Ser.* **2017**, *574*, 1–57.
- 848 (40) Ronconi, R. A.; Koopman, H. N.; McKinstry, C. A. E.; Wong, S. N. P.; Westgate,  
849 A. J. Inter-Annual Variability in Diet of Non-Breeding Pelagic Seabirds Puffinus  
850 Spp. at Migratory Staging Areas: Evidence from Stable Isotopes and Fatty Acids.  
851 *Mar. Ecol. Prog. Ser.* **2010**, *419*, 267–282. <https://doi.org/10.3354/meps08860>.
- 852 (41) Lorente, J. A.; Lorente, M.; Villanueva, E. Postmortem Stability of Lung Surfactant  
853 Phospholipids. *J. Forensic Sci.* **1992**, *37* (5), 1332J.  
854 <https://doi.org/10.1520/jfs13322j>.
- 855 (42) Noble, R. C.; Cocchi, M. Lipid Metabolism and the Neonatal Chicken. *Prog. Lipid*  
856 *Res* **1990**, *29*, 107–140.
- 857 (43) Schreiber, R. Nesting Chronology of the Eastern Brown Pelican. *Auk* **1980**, *97* (3),  
858 491–508. <https://doi.org/10.1093/auk/97.3.491>.
- 859 (44) Condor, S. T.; Winter, N.; Gensch, R. H.; Brown, C. P. Ticks as a Factor in Nest



- 860 Desertion of California Brown Pelicans Author ( s ): Kirke A . King , James O .  
861 Keith , Christine A . Mitchell and James E . Keirans Published by : Oxford  
862 University Press Stable URL : <https://www.jstor.org/stable/1367739> REFEREN.  
863 **2020**, 79 (4), 507–509.
- 864 (45) Brooke, M. de L.; Bonnaud, E.; Dilley, B. J.; Flint, E. N.; Holmes, N. D.; Jones, H.  
865 P.; Provost, P.; Rocamora, G.; Ryan, P. G.; Surman, C.; Buxton, R. T. Seabird  
866 Population Changes Following Mammal Eradications on Islands. *Anim. Conserv.*  
867 **2018**, 21 (1), 3–12. <https://doi.org/10.1111/acv.12344>.
- 868 (46) Nisbet, I. C. T.; Welton, M. J. Seasonal Variations in Breeding Success of  
869 Common Terns: Consequences of Predation. *Condor* **1984**, 86 (1), 53.  
870 <https://doi.org/10.2307/1367345>.
- 871 (47) van Franeker, J. A. Save the North Sea Fulmar-Litter-EcoQO Manual - Part 1:  
872 Collection and Dissection Procedures. *Alterra-rapport* **2004**, 672, 1–38.
- 873 (48) Malinsky, M. D.; Jacoby, C. B.; Reagen, W. K. Determination of Perfluorinated  
874 Compounds in Fish Fillet Homogenates: Method Validation and Application to  
875 Fillet Homogenates from the Mississippi River. *Anal. Chim. Acta* **2011**, 683 (2),  
876 248–257. <https://doi.org/10.1016/j.aca.2010.10.028>.
- 877 (49) Powley, C. R.; George, S. W.; Ryan, T. W.; Buck, R. C. Matrix Effect-Free  
878 Analytical Methods for Determination of Perfluorinated Carboxylic Acids in  
879 Environmental Matrixes. *Anal. Chem.* **2005**, 77 (19), 6353–6358.  
880 <https://doi.org/10.1021/ac0508090>.
- 881 (50) Berger, U.; Haukås, M.; Hauk, M. Validation of a Screening Method Based on  
882 Liquid Chromatography Coupled to High-Resolution Mass Spectrometry for  
883 Analysis of Perfluoroalkylated Substances in Biota. *J. Chromatogr. A* **2005**, 1081  
884 (2), 210–217. <https://doi.org/10.1016/j.chroma.2005.05.064>.
- 885 (51) Chambers, E.; Wagrowski-Diehl, D. M.; Lu, Z.; Mazzeo, J. R. Systematic and  
886 Comprehensive Strategy for Reducing Matrix Effects in LC/MS/MS Analyses. *J.*  
887 *Chromatogr. B Anal. Technol. Biomed. Life Sci.* **2007**, 852 (1–2), 22–34.  
888 <https://doi.org/10.1016/j.jchromb.2006.12.030>.
- 889 (52) Dassuncao, C.; Pickard, H.; Pfohl, M.; Tokranov, A. K.; Li, M.; Mikkelsen, B.; Slitt,  
890 A.; Sunderland, E. M. Phospholipid Levels Predict the Tissue Distribution of Poly-  
891 and Perfluoroalkyl Substances in a Marine Mammal. *Environ. Sci. Technol. Lett.*  
892 **2019**, 6 (3), acs.estlett.9b00031. <https://doi.org/10.1021/acs.estlett.9b00031>.
- 893 (53) Leat, E. H. K.; Bourgeon, S.; Eze, J. I.; Muir, D. C. G.; Williamson, M.; Bustnes, J.  
894 O.; Furness, R. W.; Borgå, K. Perfluoroalkyl Substances in Eggs and Plasma of  
895 an Avian Top Predator, Great Skua (*Stercorarius Skua*), in the North Atlantic.  
896 *Environ. Toxicol. Chem.* **2013**, 32 (3), 569–576. <https://doi.org/10.1002/etc.2101>.
- 897 (54) Mallin, M. A.; Lewitus, A. J. The Importance of Tidal Creek Ecosystems. *J. Exp.*  
898 *Mar. Bio. Ecol.* **2004**, 298 (2), 145–149. [https://doi.org/10.1016/S0022-](https://doi.org/10.1016/S0022-0981(03)00356-3)  
899 [0981\(03\)00356-3](https://doi.org/10.1016/S0022-0981(03)00356-3).
- 900 (55) NOAA Office for Coastal Management. C-CAP Land Cover Atlas  
901 <https://coast.noaa.gov/digitalcoast/tools/lca.html>.
- 902 (56) Haines, E. B. Stable Carbon Isotope Ratios in the Biota, Soils and Tidal Water of  
903 a Georgia Salt Marsh. *Estuar. Coast. Mar. Sci.* **1976**, 4 (6), 609–616.  
904 [https://doi.org/10.1016/0302-3524\(76\)90069-4](https://doi.org/10.1016/0302-3524(76)90069-4).
- 905 (57) Druffel, E. R. M.; Williams, P. M.; Bauer, J. E.; Ertel, J. R. Cycling of Dissolved

- 906 and Particulate Organic Matter in the Open Ocean. *J. Geophys. Res.* **1992**, 97  
907 (C10). <https://doi.org/10.1029/92jc01511>.
- 908 (58) Hobson, K. A.; Piatt, J. F.; Pitocchelli, J. Using Stable Isotopes to Determine  
909 Seabird Trophic Relationships. *J. Anim. Ecol.* **1994**, 63 (4), 786–798.
- 910 (59) Munoz, G.; Budzinski, H. H.; Labadie, P.; Budzinski, H. H.; Labadie, P.; Budzinski,  
911 H. H.; Labadie, P. Influence of Environmental Factors on the Fate of Legacy and  
912 Emerging Per- and Polyfluoroalkyl Substances along the Salinity/Turbidity  
913 Gradient of a Macrotidal Estuary. *Environ. Sci. Technol.* **2017**, 51 (21),  
914 [acs.est.7b03626](https://doi.org/10.1021/acs.est.7b03626). <https://doi.org/10.1021/acs.est.7b03626>.
- 915 (60) Zhang, X.; Lohmann, R.; Sunderland, E. M. Poly- and Perfluoroalkyl Substances  
916 (PFAS) in Seawater and Plankton from the Northwestern Atlantic Margin. *Environ.*  
917 *Sci. Technol.* **2019**, 53 (21), 12348–12356.  
918 <https://doi.org/10.1021/acs.est.9b03230>.
- 919 (61) Zhang, C.; Hopkins, Z. R.; Mccord, J.; Strynar, M. J.; Detlef, R. U.; Knappe, D. R.  
920 U. Fate of Per- and Polyfluoroalkyl Ether Acids in the Total Oxidizable Precursor  
921 Assay and Implications for the Analysis of Impacted Water. *Environ. Sci. Technol.*  
922 *Lett.* **2019**. <https://doi.org/10.1021/acs.estlett.9b00525>.
- 923 (62) Ensign, S. H.; Halls, J. N.; Mallin, M. A. Application of Digital Bathymetry Data in  
924 an Analysis of Flushing Times of Two Large Estuaries. *Comput. Geosci.* **2004**, 30  
925 (5), 501–511. <https://doi.org/10.1016/j.cageo.2004.03.015>.
- 926 (63) Arnot, J. A.; Gobas, F. A. P. C. A Review of Bioconcentration Factor (BCF) and  
927 Bioaccumulation Factor (BAF) Assessments for Organic Chemicals in Aquatic  
928 Organisms. *Environ. Rev.* **2006**, 14 (4), 257–297. [https://doi.org/10.1139/A06-](https://doi.org/10.1139/A06-005)  
929 005.
- 930
- 931
